# Supplementary material
Source: PubMed Central journal article supplement (PMC9903759)
Supplement: mmc1.pdf [file mmc1.pdf]

**Cell Genomics, Volume 1**

**Supplemental information**

**Machine learning enables new insights into  
genetic contributions to liver fat accumulation**

**Mary E. Haas, James P. Pirruccello, Samuel N. Friedman, Minxian Wang, Connor A. Emdin, Veeral H. Ajmera, Tracey G. Simon, Julian R. Homburger, Xiuqing Guo, Matthew Budoff, Kathleen E. Corey, Alicia Y. Zhou, Anthony Philippakis, Patrick T. Ellinor, Rohit Loomba, Puneet Batra, and Amit V. Khera**

## Table of Contents

|                                                                                                                                                                                                                                                                            |    |
|----------------------------------------------------------------------------------------------------------------------------------------------------------------------------------------------------------------------------------------------------------------------------|----|
| Table S1. Baseline characteristics of participants in UK Biobank stratified by inclusion in the imaging substudy, Related to Table 1. ....                                                                                                                                 | 3  |
| Table S2. Definitions of disease in each cohort, Related to STAR methods.....                                                                                                                                                                                              | 4  |
| Table S3. 95% credible sets after fine-mapping of lead variant at eight common GWAS loci associated with quantitative liver fat, Related to Table 2.....                                                                                                                   | 5  |
| Table S4. Effects of eight common variants associated with quantitative liver fat in the n=4,040 individuals with previously-quantified liver fat compared to the n=32,974 individuals with liver fat quantification enabled by machine learning, Related to Table 2. .... | 6  |
| Table S5. Effect of variants previously associated with liver fat, related liver disease, or cirrhosis in common variant association study, on liver fat in 32,974 individuals in UK Biobank, Related to Table 2.....                                                      | 7  |
| Table S6. Effects of eight common liver fat variants on quantitative liver fat after adjusting for alcohol consumption, Related to Table 2.....                                                                                                                            | 8  |
| Table S7. Replication of eight common UK Biobank variants associated with quantitative liver fat in two additional liver fat cohorts, Related to Table 2. ....                                                                                                             | 9  |
| Table S8. Effects of eight common variants associated with quantitative liver fat on blood biomarkers of liver injury, Related to Table 2. ....                                                                                                                            | 10 |
| Table S9. Effects of eight common variants associated with quantitative liver fat on clinical diagnoses of liver disease, Related to Table 2. ....                                                                                                                         | 11 |
| Table S10. Comparison of C statistics for discrimination of liver diseases with addition of an eight-variant polygenic score, Related to Figure 4. ....                                                                                                                    | 12 |
| Table S11. Rare inactivating variants in <i>APOB</i> are associated with decreased circulating lipids but increased markers of liver injury, Related to Figure 5. ....                                                                                                     | 13 |
| Table S12. Characteristics of UK Biobank participants with hepatic steatosis stratified by presence of an inactivating variant in <i>APOB</i> or <i>MTTP</i> , Related to Figure 5.....                                                                                    | 14 |
| Figure S1. Comparison of previously-quantified liver fat with teacher-model inferences, and teacher-model inferences with student-model inferences, Related to STAR methods.....                                                                                           | 15 |
| Figure S2. Assessment of machine learning model overfitting via model loss, Related to STAR methods. ....                                                                                                                                                                  | 16 |
| Figure S3. Prediction of liver fat using a variable dispersion beta regression model of clinical and anthropometric measurements, Related to STAR methods. ....                                                                                                            | 17 |
| Figure S4. Quantile-quantile plot for common variant genome-wide association study analysis of liver fat in 32,974 UK Biobank participants, Related to Figure 3. ....                                                                                                      | 18 |
| Figure S5. Relationship between percent liver fat and inverse normal transformation of percent liver fat among 32,974 UK Biobank participants, Related to Figures 3-5. ....                                                                                                | 19 |
| Supplemental References .....                                                                                                                                                                                                                                              | 20 |

**Table S1. Baseline characteristics of participants in UK Biobank stratified by inclusion in the imaging substudy, Related to Table 1.**

|                                                   | Overall<br>(N=502521) | Imaged<br>(N=36703) | Not Imaged<br>(N=465818) | P-value                |
|---------------------------------------------------|-----------------------|---------------------|--------------------------|------------------------|
| Female                                            | 273394 (54.4%)        | 19049 (51.9%)       | 254345 (54.6%)           | 1.5x10 <sup>-23</sup>  |
| Age at enrollment, years                          | 56.5 (8.10)           | 54.9 (7.47)         | 56.7 (8.13)              | <1x10 <sup>-300</sup>  |
| Age at imaging, years                             | NA                    | 64.2 (7.56)         | NA                       | NA                     |
| Self-reported ethnicity                           |                       |                     |                          |                        |
| White                                             | 472711 (94.1%)        | 35572 (96.9%)       | 437139 (93.8%)           | 1.2x10 <sup>-114</sup> |
| Black                                             | 8034 (1.6%)           | 214 (0.6%)          | 7820 (1.7%)              | 8.8x10 <sup>-59</sup>  |
| Other Asian                                       | 3389 (0.7%)           | 165 (0.4%)          | 3224 (0.7%)              | 3.7x10 <sup>-8</sup>   |
| South Asian                                       | 8024 (1.6%)           | 313 (0.9%)          | 7711 (1.7%)              | 1.7x10 <sup>-32</sup>  |
| Multiple, other or not provided                   | 10363 (2.1%)          | 439 (1.2%)          | 9924 (2.1%)              | 7.7x10 <sup>-34</sup>  |
| Coronary artery disease                           | 17404 (3.5%)          | 1076 (2.9%)         | 16328 (3.5%)             | 7.2x10 <sup>-9</sup>   |
| Diabetes                                          | 27848 (5.5%)          | 1808 (4.9%)         | 26040 (5.6%)             | 8.5x10 <sup>-8</sup>   |
| Obese                                             | 122252 (24.3%)        | 6495 (17.7%)        | 115757 (24.9%)           | 6.8x10 <sup>-215</sup> |
| Hypertension                                      | 147343 (29.3%)        | 10289 (28.0%)       | 137054 (29.4%)           | 1.8x10 <sup>-8</sup>   |
| Medications                                       |                       |                     |                          |                        |
| Anti-hypertensive therapy                         | 104005 (20.7%)        | 4940 (13.5%)        | 99065 (21.3%)            | 9.4x10 <sup>-277</sup> |
| Lipid-lowering therapy                            | 98894 (19.7%)         | 5552 (15.1%)        | 93342 (20.0%)            | 6.3x10 <sup>-115</sup> |
| Anthropometric data                               |                       |                     |                          |                        |
| Weight, kg                                        | 78.1 (15.9)           | 76.8 (14.8)         | 78.2 (16.0)              | 5.3x10 <sup>-43</sup>  |
| Waist-to-hip ratio                                | 0.87 (0.09)           | 0.86 (0.09)         | 0.87 (0.09)              | 1.7x10 <sup>-142</sup> |
| Body-mass index, kg/m <sup>2</sup>                | 27.4 (4.80)           | 26.6 (4.19)         | 27.5 (4.84)              | 7.0x10 <sup>-277</sup> |
| Body fat, %                                       | 31.5 (8.55)           | 30.0 (8.17)         | 31.6 (8.57)              | 7.7x10 <sup>-258</sup> |
| Estimated untreated systolic blood pressure, mmHg | 141 (20.7)            | 137 (19.3)          | 141 (20.8)               | 6.8x10 <sup>-292</sup> |
| Alcohol consumption                               |                       |                     |                          |                        |
| Weekly drinks, U.S. standard                      | 4.84 (6.74)           | 5.48 (6.37)         | 4.79 (6.76)              | 1.5x10 <sup>-264</sup> |
| Weekly drinks, U.K. standard                      | 8.47 (11.8)           | 9.58 (11.1)         | 8.38 (11.8)              | 1.5x10 <sup>-264</sup> |
| Excessive alcohol intake, U.S.                    | 26408 (5.3%)          | 2015 (5.5%)         | 24393 (5.2%)             | 0.036                  |
| Excessive alcohol intake, U.K.                    | 105842 (21.1%)        | 9066 (24.7%)        | 96776 (20.8%)            | 1.5x10 <sup>-70</sup>  |
| Liver-associated biomarker concentrations         |                       |                     |                          |                        |
| Alanine aminotransferase, IU/L                    | 23.5 (14.2)           | 23.0 (13.9)         | 23.6 (14.2)              | 1.7x10 <sup>-18</sup>  |
| Aspartate aminotransferase, IU/L                  | 26.2 (10.7)           | 25.8 (10.5)         | 26.3 (10.7)              | 2.5x10 <sup>-17</sup>  |
| Gamma glutamyltransferase, IU/L                   | 37.4 (42.1)           | 33.7 (33.9)         | 37.7 (42.7)              | 2.2x10 <sup>-119</sup> |
| Estimated untreated lipid concentrations          |                       |                     |                          |                        |
| Total cholesterol, mg/dL                          | 228 (42.4)            | 227 (40.7)          | 228 (42.5)               | 2.7x10 <sup>-8</sup>   |
| LDL cholesterol, mg/dL                            | 146 (33.3)            | 144 (32.0)          | 146 (33.4)               | 1.8x10 <sup>-20</sup>  |
| HDL cholesterol, mg/dL                            | 56.0 (14.8)           | 57.0 (14.5)         | 55.9 (14.8)              | 2.2x10 <sup>-45</sup>  |
| Triglycerides, mg/dL                              | 135 [94-197]          | 126 [89-184]        | 136 [95-199]             | 8.4x10 <sup>-127</sup> |
| Glycemic biomarker concentrations                 |                       |                     |                          |                        |
| Glycated hemoglobin, %                            | 5.46 (0.620)          | 5.36 (0.475)        | 5.47 (0.629)             | 2.3x10 <sup>-260</sup> |
| Random glucose, mg/dL                             | 92.3 (22.4)           | 89.9 (17.5)         | 92.5 (22.7)              | 1.9x10 <sup>-93</sup>  |

Values correspond to number (%), mean (standard deviation), or median [interquartile range]. P-values correspond to chi-squared test or Wilcoxon rank sum for categorical and continuous variables, respectively, for imaged compared to not imaged. Obesity was defined as body-mass index  $\geq 30$  kg/m<sup>2</sup> [1]; excessive alcohol intake, U.S. was defined as alcohol intake exceeding American Association for the Study of Liver Disease guidelines for NAFLD definition [2]; excessive alcohol intake, U.K. was defined as alcohol intake exceeding the UK Chief Medical Officers recommendations [3]. Diseases were defined as prevalent at time of initial assessment. Estimated untreated lipid measures and blood pressure were according to previously described adjustments [4,5]. NA, Not applicable.

**Table S2. Definitions of disease in each cohort, Related to STAR methods.**

| Cohort                       | Disease                  | Definition                                                                                                                                                                                                                                                                                                                                                                                                                                                                                                                                                                                                                                                                                                                                                                                                                                                                                                                                                                                                                                                                                                                                                                                                                                                |
|------------------------------|--------------------------|-----------------------------------------------------------------------------------------------------------------------------------------------------------------------------------------------------------------------------------------------------------------------------------------------------------------------------------------------------------------------------------------------------------------------------------------------------------------------------------------------------------------------------------------------------------------------------------------------------------------------------------------------------------------------------------------------------------------------------------------------------------------------------------------------------------------------------------------------------------------------------------------------------------------------------------------------------------------------------------------------------------------------------------------------------------------------------------------------------------------------------------------------------------------------------------------------------------------------------------------------------------|
| UK Biobank                   | NAFLD                    | Hospitalization due to nonalcoholic fatty liver (ICD10 K76.0)                                                                                                                                                                                                                                                                                                                                                                                                                                                                                                                                                                                                                                                                                                                                                                                                                                                                                                                                                                                                                                                                                                                                                                                             |
| UK Biobank                   | NASH                     | Hospitalization due to other specified inflammatory liver diseases including nonalcoholic steatohepatitis (ICD10 K75.8)                                                                                                                                                                                                                                                                                                                                                                                                                                                                                                                                                                                                                                                                                                                                                                                                                                                                                                                                                                                                                                                                                                                                   |
| UK Biobank                   | NAFLD/NASH               | Hospitalization due to nonalcoholic fatty liver (ICD10 K76.0) or other specified inflammatory liver diseases including nonalcoholic steatohepatitis (ICD10 K75.8)                                                                                                                                                                                                                                                                                                                                                                                                                                                                                                                                                                                                                                                                                                                                                                                                                                                                                                                                                                                                                                                                                         |
| UK Biobank                   | Cirrhosis                | Hospitalization or death due to (ICD10; ICD9 codes): cirrhosis (K74.6; 5715), alcoholic cirrhosis or liver damage (K70.3; 5712, 5713), esophageal varices (I85.0,I85.9; 4560, 4561) or portal hypertension (K76.6; 5723)                                                                                                                                                                                                                                                                                                                                                                                                                                                                                                                                                                                                                                                                                                                                                                                                                                                                                                                                                                                                                                  |
| UK Biobank                   | Hepatocellular Carcinoma | Hospitalization due to liver cell carcinoma (ICD10 C22.0)                                                                                                                                                                                                                                                                                                                                                                                                                                                                                                                                                                                                                                                                                                                                                                                                                                                                                                                                                                                                                                                                                                                                                                                                 |
| UK Biobank                   | Hepatitis B/C            | Hospitalization due to hepatitis B or C (ICD10 B18.0-.2) or self-reported hepatitis B or C during verbal interview with trained nurse (df-20002)                                                                                                                                                                                                                                                                                                                                                                                                                                                                                                                                                                                                                                                                                                                                                                                                                                                                                                                                                                                                                                                                                                          |
| UK Biobank                   | Coronary Artery Disease  | Self-report of heart attack diagnosed by doctor (df-6150), self-reported heart attack, coronary angioplasty, coronary artery bypass grafts, or triple heart bypass during verbal interview with trained nurse (df-20002, df-20004), hospitalization or death due to myocardial infarction (ICD10 I21, I21.0-4, I21.9, I22, I22.0, I22.1, I22.8, I22.9, I23, I23.0-.6, I23.8; ICD9 410, 4109, 412, 4129), ischemic heart disease ICD10 (I24, I24.0, I24.1, I24.8, I24.9, I25.2; ICD9 411, 4119); operative procedures: replacement of coronary artery(ies) (K40, K40.1-.4, K40.8-.9, K41, K41.1-.4, K41.8-.9, K42,K42.1-.4,K42.8-.9, K43, K43.1-.4, K43.8-.9, K44, K44.1-.2, K44.8-.9), connection of thoracic artery to coronary artery (K45.1-K45.6, K45.8-.9), other bypass of coronary artery(ies) (K46, K46.1-K46.5, K46.8-.9), endarterectomy of coronary artery (K47.1), percutaneous transluminal balloon angioplasty of coronary artery(ies) (K49.1-.4,K49.8-.9), transluminal operations on coronary artery (K50.1-.2, K50.4), percutaneous transluminal balloon angioplasty and insertion of stent into coronary artery (K75.1-.4,K75.8-.9), adjudicated report of myocardial infarction from self-report, hospitalization, or death (df-42001) |
| UK Biobank                   | Diabetes                 | Self-reported diabetes during verbal interview with trained nurse (df-20002), hospitalization or death due to diabetes (ICD10 E10, E10.0-.9, E11, E11.0-.9, E12, E12.1, E12.8, E12.9, E13, E13.1-.9, E14, E14.0-.9, N08.3, O24.0-.3; ICD9 2500, 25000, 25001, 25009, 25010, 25011, 25019, 2502, 2503, 2504, 2505, 25099)                                                                                                                                                                                                                                                                                                                                                                                                                                                                                                                                                                                                                                                                                                                                                                                                                                                                                                                                  |
| UK Biobank                   | Hypertension             | Self-report of high blood pressure diagnosed by doctor (df-6150), self-reported hypertension, or essential hypertension during verbal interview with trained nurse (df-20002); hospitalization or death due to (ICD10; ICD9 codes) essential hypertension (I10; 401, 4010, 4011, 4019), hypertensive heart disease (I11, I11.0, I11.9, I13, I13.0-13.2; 402, 4020, 4021, 4029, 404, 4040, 4041, 4049), hypertensive renal disease (I12, I12.0, I12.9, I13, I13.0-13.2; 403, 4030, 4031, 4039, 404, 4040, 4041, 4049), secondary hypertension or renovascular hypertension (I15, I15.0-15.2, I15.8, I15.9; 405, 4050, 4051, 4059)                                                                                                                                                                                                                                                                                                                                                                                                                                                                                                                                                                                                                          |
| Mass General Brigham Biobank | NAFLD/NASH               | Hospitalization due to nonalcoholic fatty liver (ICD10 K76.0) or nonalcoholic steatohepatitis (ICD10 K75.81)                                                                                                                                                                                                                                                                                                                                                                                                                                                                                                                                                                                                                                                                                                                                                                                                                                                                                                                                                                                                                                                                                                                                              |

NAFLD, nonalcoholic fatty liver disease; NASH, nonalcoholic steatohepatitis.

**Table S3. 95% credible sets after fine-mapping of lead variant at eight common GWAS loci associated with quantitative liver fat, Related to Table 2.**

| Variant     | Chr. | Position (hg19) | Nearest Gene   | Variant Consequence  | Effect Allele | Other Allele | Effect Allele Freq. | Effect on Liver Fat (Beta, SD) | P-value | PIP    | Lead Variant at Locus? |
|-------------|------|-----------------|----------------|----------------------|---------------|--------------|---------------------|--------------------------------|---------|--------|------------------------|
| rs2642438   | 1    | 220970028       | <i>MTARC1</i>  | Missense (p.T165A)   | G             | A            | 0.70                | 0.052                          | 1.7E-09 | 0.91   | Yes                    |
| rs867772    | 1    | 220972343       | <i>MTARC1</i>  | Intronic             | G             | A            | 0.69                | 0.047                          | 3.3E-08 | 0.05   | No                     |
| rs1229984   | 4    | 100239319       | <i>ADH1B</i>   | Missense (p.H48R)    | C             | T            | 0.98                | 0.158                          | 7.0E-10 | 0.9997 | Yes                    |
| rs112875651 | 8    | 126506694       | <i>TRIB1</i>   | Intergenic           | G             | A            | 0.61                | 0.050                          | 3.8E-10 | 0.77   | Yes                    |
| rs28601761  | 8    | 126500031       | <i>TRIB1</i>   | Intergenic           | C             | G            | 0.58                | 0.047                          | 2.0E-09 | 0.16   | No                     |
| rs2001844   | 8    | 126478745       | <i>TRIB1</i>   | Intergenic           | A             | G            | 0.52                | 0.037                          | 1.5E-06 | 0.03   | No                     |
| rs2792751   | 10   | 113940329       | <i>GPAM</i>    | Missense (p.V43I)    | T             | C            | 0.27                | 0.053                          | 2.1E-09 | 0.26   | No                     |
| rs2254537   | 10   | 113917085       | <i>GPAM</i>    | Synonymous           | T             | A            | 0.27                | 0.053                          | 2.6E-09 | 0.22   | No                     |
| rs10787429  | 10   | 113949664       | <i>GPAM</i>    | Intronic; Non-coding | T             | C            | 0.27                | 0.054                          | 1.8E-09 | 0.20   | No                     |
| rs77987196  | 10   | 113933006       | <i>GPAM</i>    | Intronic             | ATT           | A            | 0.27                | 0.052                          | 5.1E-09 | 0.12   | No                     |
| rs2297991   | 10   | 113913222       | <i>GPAM</i>    | 3' UTR               | T             | C            | 0.28                | 0.050                          | 1.7E-08 | 0.03   | No                     |
| rs2250802   | 10   | 113921354       | <i>GPAM</i>    | Intronic             | G             | A            | 0.27                | 0.054                          | 1.4E-09 | 0.02   | Yes                    |
| rs2803619   | 10   | 113934384       | <i>GPAM</i>    | Intronic             | G             | C            | 0.27                | 0.053                          | 2.2E-09 | 0.01   | No                     |
| rs2803611   | 10   | 113922728       | <i>GPAM</i>    | Intronic             | A             | G            | 0.27                | 0.053                          | 2.3E-09 | 0.01   | No                     |
| rs2803608   | 10   | 113916302       | <i>GPAM</i>    | Intronic             | T             | C            | 0.27                | 0.053                          | 2.5E-09 | 0.01   | No                     |
| rs2254532   | 10   | 113916835       | <i>GPAM</i>    | Intronic             | A             | C            | 0.27                | 0.053                          | 2.6E-09 | 0.01   | No                     |
| rs2792736   | 10   | 113921159       | <i>GPAM</i>    | Intronic             | T             | A            | 0.27                | 0.053                          | 2.7E-09 | 0.009  | No                     |
| rs4918722   | 10   | 113947040       | <i>GPAM</i>    | Upstream             | C             | T            | 0.27                | 0.053                          | 2.6E-09 | 0.009  | No                     |
| rs2792759   | 10   | 113936855       | <i>GPAM</i>    | Intronic             | C             | T            | 0.27                | 0.053                          | 3.2E-09 | 0.008  | No                     |
| rs2803621   | 10   | 113939584       | <i>GPAM</i>    | Intronic             | G             | A            | 0.27                | 0.053                          | 3.6E-09 | 0.007  | No                     |
| rs1129555   | 10   | 113910721       | <i>GPAM</i>    | 3' UTR               | A             | G            | 0.27                | 0.053                          | 3.5E-09 | 0.007  | No                     |
| rs2792735   | 10   | 113921825       | <i>GPAM</i>    | Intronic             | G             | A            | 0.28                | 0.052                          | 3.2E-09 | 0.007  | No                     |
| rs2803609   | 10   | 113919124       | <i>GPAM</i>    | Intronic             | A             | G            | 0.27                | 0.052                          | 4.0E-09 | 0.007  | No                     |
| rs429358    | 19   | 45411941        | <i>APOE</i>    | Missense (p.R130C)   | T             | C            | 0.85                | 0.121                          | 1.5E-29 | 1.00   | Yes                    |
| rs56252442  | 19   | 18229208        | <i>MAST3</i>   | Intronic             | T             | G            | 0.25                | 0.049                          | 2.7E-08 | 0.67   | Yes                    |
| rs60146811  | 19   | 18221213        | <i>MAST3</i>   | Intronic             | A             | G            | 0.27                | 0.044                          | 4.4E-07 | 0.07   | No                     |
| rs67234314  | 19   | 18218610        | <i>MAST3</i>   | Intronic             | T             | A            | 0.27                | 0.044                          | 3.6E-07 | 0.05   | No                     |
| rs885683    | 19   | 18244690        | <i>MAST3</i>   | Intronic             | A             | G            | 0.25                | 0.047                          | 9.6E-08 | 0.03   | No                     |
| rs746721254 | 19   | 18220370        | <i>MAST3</i>   | Intronic             | A             | AGAGT        | 0.27                | 0.045                          | 1.7E-07 | 0.03   | No                     |
| rs72999466  | 19   | 18248499        | <i>MAST3</i>   | Intronic             | T             | C            | 0.26                | 0.046                          | 2.8E-07 | 0.03   | No                     |
| rs56345159  | 19   | 18235873        | <i>MAST3</i>   | Intronic             | T             | C            | 0.25                | 0.048                          | 1.1E-07 | 0.03   | No                     |
| rs874628    | 19   | 18304700        | <i>MPV17L2</i> | Missense (p.M72V)    | G             | A            | 0.28                | 0.040                          | 2.8E-06 | 0.03   | No                     |
| rs11554159  | 19   | 18285944        | <i>IFI30</i>   | Missense (p.R76Q)    | A             | G            | 0.27                | 0.042                          | 3.2E-06 | 0.02   | No                     |
| rs58542926  | 19   | 19379549        | <i>TM6SF2</i>  | Missense (p.E167K)   | T             | C            | 0.07                | 0.289                          | 2.8E-85 | 0.99   | Yes                    |
| rs738409    | 22   | 44324727        | <i>PNPLA3</i>  | Missense (p.I148M)   | G             | C            | 0.21                | 0.195                          | 5.6E-95 | 0.94   | No                     |
| rs738408    | 22   | 44324730        | <i>PNPLA3</i>  | Synonymous           | T             | C            | 0.21                | 0.195                          | 5.3E-95 | 0.06   | Yes                    |

Chr., chromosome; Freq., frequency; PIP, posterior inclusion probability; GWAS, genome-wide association study; Effect on liver fat (Beta, SD), effect of variant on inverse normal transformed liver fat in standard deviation (SD) units.

**Table S4. Effects of eight common variants associated with quantitative liver fat in the n=4,040 individuals with previously-quantified liver fat compared to the n=32,974 individuals with liver fat quantification enabled by machine learning, Related to Table 2.**

|                                       |      |                 |               |               |              | Variant effects in 4,040 individuals with previously-quantified liver fat |       |         | Variant effects in machine-learning expansion to 32,974 individuals with liver fat |       |         |
|---------------------------------------|------|-----------------|---------------|---------------|--------------|---------------------------------------------------------------------------|-------|---------|------------------------------------------------------------------------------------|-------|---------|
| Lead Variant                          | Chr. | Position (hg19) | Nearest Gene  | Effect Allele | Other Allele | Effect on Liver Fat (Beta, SD)                                            | SE    | P-value | Effect on Liver Fat (Beta, SD)                                                     | SE    | P-value |
| <b>Newly-identified variants</b>      |      |                 |               |               |              |                                                                           |       |         |                                                                                    |       |         |
| rs2642438                             | 1    | 220970028       | <i>MTARC1</i> | G             | A            | 0.03                                                                      | 0.024 | 0.160   | 0.05                                                                               | 0.008 | 1.7E-09 |
| rs1229984                             | 4    | 100239319       | <i>ADH1B</i>  | C             | T            | 0.16                                                                      | 0.073 | 0.026   | 0.16                                                                               | 0.025 | 7.0E-10 |
| rs112875651                           | 8    | 126506694       | <i>TRIB1</i>  | G             | A            | 0.08                                                                      | 0.023 | 3.6E-04 | 0.05                                                                               | 0.008 | 3.8E-10 |
| rs2250802                             | 10   | 113921354       | <i>GPAM</i>   | G             | A            | 0.07                                                                      | 0.025 | 5.9E-03 | 0.05                                                                               | 0.009 | 1.4E-09 |
| rs56252442                            | 19   | 18229208        | <i>MAST3</i>  | T             | G            | 0.06                                                                      | 0.025 | 0.012   | 0.05                                                                               | 0.009 | 2.7E-08 |
| <b>Previously-identified variants</b> |      |                 |               |               |              |                                                                           |       |         |                                                                                    |       |         |
| rs58542926                            | 19   | 19379549        | <i>TM6SF2</i> | T             | C            | 0.35                                                                      | 0.042 | 9.3E-17 | 0.29                                                                               | 0.015 | 2.8E-85 |
| rs429358                              | 19   | 45411941        | <i>APOE</i>   | T             | C            | 0.14                                                                      | 0.031 | 7.1E-06 | 0.12                                                                               | 0.011 | 1.5E-29 |
| rs738409                              | 22   | 44324727        | <i>PNPLA3</i> | G             | C            | 0.25                                                                      | 0.027 | 2.3E-20 | 0.19                                                                               | 0.009 | 5.6E-95 |

Chr., chromosome; SE, standard error; Effect on liver fat (Beta, SD), effect of variant on inverse normal transformed liver fat in standard deviation (SD) units.

**Table S5. Effect of variants previously associated with liver fat, related liver disease, or cirrhosis in common variant genome-wide association study, on liver fat in 32,974 individuals in UK Biobank, Related to Table 2.**

| Variant    | Chr. | Position (hg19) | Effect Allele | Other Allele | Effect Allele Freq. | Effect on liver fat (Beta, SD) | P-value  | Locus              | Previous reference(s) |
|------------|------|-----------------|---------------|--------------|---------------------|--------------------------------|----------|--------------------|-----------------------|
| rs12077210 | 1    | 65894160        | C             | T            | 0.96                | -0.03                          | 0.11     | <i>LEPR</i>        | [6]                   |
| rs12137855 | 1    | 219448378       | C             | T            | 0.79                | 0.01                           | 0.46     | <i>LYPLAL1</i>     | [7,8]                 |
| rs1260326  | 2    | 27730940        | T             | C            | 0.39                | 0.04                           | 4.10E-07 | <i>GCKR</i>        | [8–10]                |
| rs780094   | 2    | 27741237        | T             | C            | 0.38                | 0.04                           | 3.50E-06 | <i>GCKR</i>        | [7,8]                 |
| rs6834314  | 4    | 88213808        | A             | G            | 0.72                | 0.01                           | 0.32     | <i>HSD17B13</i>    | [11–13]               |
| rs72613567 | 4    | 88231392        | T             | TA           | 0.73                | 0.01                           | 0.40     | <i>HSD17B13</i>    | [11–13]               |
| rs62305723 | 4    | 88231429        | G             | A            | 0.93                | 0.01                           | 0.59     | <i>HSD17B13</i>    | [12]                  |
| rs11134977 | 5    | 175904141       | T             | C            | 0.55                | -0.01                          | 0.09     | <i>FAF2</i>        | [14]                  |
| rs4240624  | 8    | 9184231         | G             | A            | 0.09                | -0.02                          | 0.10     | <i>PPP1R3B</i>     | [7,8]                 |
| rs10883451 | 10   | 101924418       | T             | C            | 0.50                | 0.02                           | 0.02     | <i>ERLIN1</i>      | [15]                  |
| rs11597086 | 10   | 101953705       | A             | C            | 0.55                | 0.02                           | 0.01     | <i>CHUK</i>        | [15]                  |
| rs62021874 | 15   | 55874043        | C             | T            | 0.93                | -0.02                          | 0.29     | <i>PYGO1</i>       | [6]                   |
| rs2228603  | 19   | 19329924        | C             | T            | 0.92                | -0.22                          | 1.80E-51 | <i>NCAN</i>        | [7,8]                 |
| rs641738   | 19   | 54676763        | C             | T            | 0.56                | -0.03                          | 8.80E-06 | <i>MBOAT7-TMC4</i> | [16–18]               |

Chr., chromosome; Freq., frequency; Effect on liver fat (Beta, SD), effect of variant on inverse normal transformed liver fat in standard deviation (SD) units.

**Table S6. Effects of eight common liver fat variants on quantitative liver fat after adjusting for alcohol consumption, Related to Table 2.**

| Lead Variant                          | Chr. | Position (hg19) | Nearest Gene | Effect Allele | Unadjusted for alcohol consumption (original CVAS, n=32974) |       |          | Former alcohol consumers excluded, adjusted for number of weekly drinks (n=32062) |       |          | Former and excessive alcohol consumers (US guidelines) excluded (n=30216) |       |          | Former and excessive alcohol consumers (UK guidelines) excluded (n=23931) |       |          |
|---------------------------------------|------|-----------------|--------------|---------------|-------------------------------------------------------------|-------|----------|-----------------------------------------------------------------------------------|-------|----------|---------------------------------------------------------------------------|-------|----------|---------------------------------------------------------------------------|-------|----------|
|                                       |      |                 |              |               | Effect on liver fat (Beta, SD)                              | SE    | P-value  | Effect on liver fat (Beta, SD)                                                    | SE    | P-value  | Effect on liver fat (Beta, SD)                                            | SE    | P-value  | Effect on liver fat (Beta, SD)                                            | SE    | P-value  |
| <b>Newly-Identified variants</b>      |      |                 |              |               |                                                             |       |          |                                                                                   |       |          |                                                                           |       |          |                                                                           |       |          |
| rs2642438                             | 1    | 220970028       | MTARC1       | G             | 0.052                                                       | 0.008 | 1.70E-09 | 0.050                                                                             | 0.009 | 8.70E-09 | 0.046                                                                     | 0.009 | 4.20E-07 | 0.052                                                                     | 0.010 | 3.20E-07 |
| rs1229984                             | 4    | 100239319       | ADH1B        | C             | 0.158                                                       | 0.025 | 7.00E-10 | 0.153                                                                             | 0.026 | 3.40E-09 | 0.147                                                                     | 0.026 | 1.40E-08 | 0.116                                                                     | 0.029 | 5.30E-05 |
| rs112875651                           | 8    | 126506694       | TRIB1        | G             | 0.050                                                       | 0.008 | 3.80E-10 | 0.053                                                                             | 0.008 | 3.70E-11 | 0.052                                                                     | 0.008 | 3.50E-10 | 0.057                                                                     | 0.009 | 8.30E-10 |
| rs2250802                             | 10   | 113921354       | GPAM         | G             | 0.054                                                       | 0.009 | 1.40E-09 | 0.056                                                                             | 0.009 | 3.70E-10 | 0.056                                                                     | 0.009 | 2.10E-09 | 0.050                                                                     | 0.010 | 1.10E-06 |
| rs56252442                            | 19   | 18229208        | MAST3        | T             | 0.049                                                       | 0.009 | 2.70E-08 | 0.050                                                                             | 0.009 | 1.70E-08 | 0.051                                                                     | 0.009 | 3.20E-08 | 0.039                                                                     | 0.011 | 1.60E-04 |
| <b>Previously-identified variants</b> |      |                 |              |               |                                                             |       |          |                                                                                   |       |          |                                                                           |       |          |                                                                           |       |          |
| rs58542926                            | 19   | 19379549        | TM6SF2       | T             | 0.289                                                       | 0.015 | 2.80E-85 | 0.288                                                                             | 0.015 | 6.10E-83 | 0.283                                                                     | 0.015 | 1.60E-75 | 0.285                                                                     | 0.017 | 3.60E-61 |
| rs429358                              | 19   | 45411941        | APOE         | T             | 0.121                                                       | 0.011 | 1.50E-29 | 0.120                                                                             | 0.011 | 3.90E-28 | 0.114                                                                     | 0.011 | 4.80E-24 | 0.102                                                                     | 0.013 | 3.90E-16 |
| rs738409                              | 22   | 44324727        | PNPLA3       | G             | 0.195                                                       | 0.009 | 5.60E-95 | 0.194                                                                             | 0.010 | 1.10E-92 | 0.191                                                                     | 0.010 | 3.20E-84 | 0.175                                                                     | 0.011 | 6.10E-56 |

Chr., chromosome; SE, standard error; Effect on liver fat (Beta, SD), effect of variant on inverse normal transformed liver fat in standard deviation (SD) units. Excessive alcohol intake, U.S. guidelines was defined as alcohol intake exceeding American Association for the Study of Liver Disease guidelines for NAFLD definition [2]; excessive alcohol intake, U.K. guidelines was defined as alcohol intake exceeding the UK Chief Medical Officers recommendations [3].



**Table S7. Replication of eight common UK Biobank variants associated with quantitative liver fat in two additional liver fat cohorts, Related to Table 2.**

| Lead Variant                          | Chr. | Position (hg19) | Nearest Gene  | Effect Allele | UK Biobank Discovery CVAS          |       |         | Framingham Heart Study Replication |       |         | MESA Replication                  |       |         | Combined Framingham + MESA Replication |       |         |                         |
|---------------------------------------|------|-----------------|---------------|---------------|------------------------------------|-------|---------|------------------------------------|-------|---------|-----------------------------------|-------|---------|----------------------------------------|-------|---------|-------------------------|
|                                       |      |                 |               |               | Effect on MRI liver fat (Beta, SD) | SE    | P-value | Effect on CT liver fat (Beta, SD)  | SE    | P-value | Effect on CT liver fat (Beta, SD) | SE    | P-value | Effect on CT liver fat (Beta, SD)      | SE    | P-value | P <sub>het</sub> -value |
| <b>Newly-identified variants</b>      |      |                 |               |               |                                    |       |         |                                    |       |         |                                   |       |         |                                        |       |         |                         |
| rs2642438                             | 1    | 220970028       | <i>MTARC1</i> | G             | 0.052                              | 0.008 | 2E-09   | 0.088                              | 0.028 | 2E-03   | 0.062                             | 0.026 | 0.017   | 0.074                                  | 0.019 | 1E-04   | 0.50                    |
| rs1229984                             | 4    | 100239319       | <i>ADH1B</i>  | C             | 0.158                              | 0.025 | 7E-10   | 0.101                              | 0.057 | 0.081   | 0.034                             | 0.040 | 0.394   | 0.056                                  | 0.033 | 0.088   | 0.34                    |
| rs112875651                           | 8    | 126506694       | <i>TRIB1</i>  | G             | 0.050                              | 0.008 | 4E-10   | 0.070                              | 0.026 | 8E-03   | 0.044                             | 0.023 | 0.059   | 0.055                                  | 0.017 | 1E-03   | 0.45                    |
| rs2250802                             | 10   | 113921354       | <i>GPAM</i>   | G             | 0.054                              | 0.009 | 1E-09   | 0.058                              | 0.028 | 0.037   | 0.031                             | 0.025 | 0.218   | 0.043                                  | 0.019 | 0.021   | 0.47                    |
| rs56252442                            | 19   | 18229208        | <i>MAST3</i>  | T             | 0.049                              | 0.009 | 3E-08   | 0.065                              | 0.032 | 0.041   | 0.017                             | 0.026 | 0.501   | 0.036                                  | 0.020 | 0.070   | 0.24                    |
| <b>Previously-identified variants</b> |      |                 |               |               |                                    |       |         |                                    |       |         |                                   |       |         |                                        |       |         |                         |
| rs58542926                            | 19   | 19379549        | <i>TM6SF2</i> | T             | 0.289                              | 0.015 | 3E-85   | 0.326                              | 0.056 | 6E-09   | 0.229                             | 0.045 | 3E-07   | 0.267                                  | 0.035 | 2E-14   | 0.17                    |
| rs429358                              | 19   | 45411941        | <i>APOE</i>   | T             | 0.121                              | 0.011 | 2E-29   | -0.119                             | 0.075 | 0.110   | 0.056                             | 0.029 | 0.054   | -0.018                                 | 0.087 | 0.837   | 0.03                    |
| rs738409                              | 22   | 44324727        | <i>PNPLA3</i> | G             | 0.195                              | 0.009 | 6E-95   | 0.278                              | 0.030 | 3E-20   | 0.296                             | 0.024 | 4E-34   | 0.289                                  | 0.019 | 3E-53   | 0.65                    |

Liver fat was measured by magnetic resonance imaging (MRI) in UK Biobank and by computed tomography (CT) imaging in the Framingham Heart Study (n=3284) and Multi-Ethnic Study of Atherosclerosis (MESA, n=4195). Effects of Framingham and MESA were combined via fixed-effects inverse variance weighted meta-analysis; random-effects models were used when nominal heterogeneity was noted (P<sub>het</sub> < 0.05). Chr., chromosome; SE, standard error; P<sub>het</sub>, heterogeneity p value; Effect on liver fat (Beta, SD), effect of variant on inverse normal transformed liver fat in standard deviation (SD) units.

**Table S8. Effects of eight common variants associated with quantitative liver fat on blood biomarkers of liver injury, Related to Table 2.**

| Lead Variant                          | Chr. | Position (hg19) | Nearest Gene  | Effect Allele | Other Allele | Effect Allele Freq. | Effect on liver fat (Beta, SD) SE P-value |       |       | Effect on ALT (U/L) SE P-value |       |         | Effect on AST (U/L) SE P-value |       |        |
|---------------------------------------|------|-----------------|---------------|---------------|--------------|---------------------|-------------------------------------------|-------|-------|--------------------------------|-------|---------|--------------------------------|-------|--------|
| <b>Newly-identified variants</b>      |      |                 |               |               |              |                     |                                           |       |       |                                |       |         |                                |       |        |
| rs2642438                             | 1    | 220970028       | <i>MTARC1</i> | G             | A            | 0.70                | 0.052                                     | 0.008 | 2E-09 | 0.47                           | 0.036 | 1E-39   | 0.16                           | 0.028 | 5E-09  |
| rs1229984                             | 4    | 100239319       | <i>ADH1B</i>  | C             | T            | 0.98                | 0.158                                     | 0.025 | 7E-10 | 0.41                           | 0.112 | 2E-04   | 0.32                           | 0.086 | 2E-04  |
| rs112875651                           | 8    | 126506694       | <i>TRIB1</i>  | G             | A            | 0.61                | 0.050                                     | 0.008 | 4E-10 | 0.56                           | 0.034 | 2E-61   | 0.19                           | 0.026 | 2E-13  |
| rs2250802                             | 10   | 113921354       | <i>GPAM</i>   | G             | A            | 0.27                | 0.054                                     | 0.009 | 1E-09 | 0.41                           | 0.037 | 3E-29   | 0.16                           | 0.028 | 3E-08  |
| rs56252442                            | 19   | 18229208        | <i>MAST3</i>  | T             | G            | 0.25                | 0.049                                     | 0.009 | 3E-08 | 0.29                           | 0.038 | 1E-14   | 0.03                           | 0.029 | 0.342  |
| <b>Previously-identified variants</b> |      |                 |               |               |              |                     |                                           |       |       |                                |       |         |                                |       |        |
| rs58542926                            | 19   | 19379549        | <i>TM6SF2</i> | T             | C            | 0.07                | 0.289                                     | 0.015 | 3E-85 | 1.28                           | 0.062 | 2E-94   | 0.67                           | 0.048 | 2E-44  |
| rs429358                              | 19   | 45411941        | <i>APOE</i>   | T             | C            | 0.85                | 0.121                                     | 0.011 | 2E-29 | 0.66                           | 0.045 | 7E-49   | 0.07                           | 0.035 | 0.045  |
| rs738409                              | 22   | 44324727        | <i>PNPLA3</i> | G             | C            | 0.21                | 0.195                                     | 0.009 | 6E-95 | 1.68                           | 0.040 | <1E-300 | 1.06                           | 0.031 | 1E-261 |

Effects on alanine aminotransferase (ALT, n=345,930 with ALT measurement) and aspartate aminotransferase (AST, n=344,799 with AST measurement) were measured in the n=362,910 subset of the UK Biobank who did not undergo abdominal MRI imaging. Chr., chromosome; Freq., frequency; SE, standard error.

**Table S9. Effects of eight common variants associated with quantitative liver fat on clinical diagnoses of liver disease, Related to Table 2.**

|                                       |      |                 |               |               |              |                     | UK Biobank                     |            |         | Mass General Brigham Biobank   |            |         | Combined UK Biobank + Mass General Brigham Biobank |            |         |                  |
|---------------------------------------|------|-----------------|---------------|---------------|--------------|---------------------|--------------------------------|------------|---------|--------------------------------|------------|---------|----------------------------------------------------|------------|---------|------------------|
| Lead Variant                          | Chr. | Position (hg19) | Nearest Gene  | Effect Allele | Other Allele | Effect Allele Freq. | Effect on NAFLD/NASH diagnosis |            |         | Effect on NAFLD/NASH diagnosis |            |         | Effect on NAFLD/NASH diagnosis                     |            |         |                  |
|                                       |      |                 |               |               |              |                     | (OR)                           | SE (logOR) | P-value | (OR)                           | SE (logOR) | P-value | (OR)                                               | SE (logOR) | P-value | $P_{het}$ -value |
| <b>Newly-identified variants</b>      |      |                 |               |               |              |                     |                                |            |         |                                |            |         |                                                    |            |         |                  |
| rs2642438                             | 1    | 220970028       | <i>MTARC1</i> | G             | A            | 0.70                | 1.14                           | 0.034      | 2E-04   | 1.06                           | 0.027      | 0.03    | 1.09                                               | 0.021      | 4E-05   | 0.12             |
| rs1229984                             | 4    | 100239319       | <i>ADH1B</i>  | C             | T            | 0.98                | 1.33                           | 0.118      | 0.015   | 1.26                           | 0.052      | 7E-06   | 1.28                                               | 0.048      | 3E-07   | 0.68             |
| rs112875651                           | 8    | 126506694       | <i>TRIB1</i>  | G             | A            | 0.61                | 1.10                           | 0.032      | 2E-03   | 1.07                           | 0.025      | 6E-03   | 1.08                                               | 0.020      | 4E-05   | 0.46             |
| rs2250802                             | 10   | 113921354       | <i>GPAM</i>   | G             | A            | 0.27                | 1.08                           | 0.033      | 0.016   | 1.07                           | 0.026      | 8E-03   | 1.08                                               | 0.021      | 3E-04   | 0.82             |
| rs56252442                            | 19   | 18229208        | <i>MAST3</i>  | T             | G            | 0.25                | 1.00                           | 0.035      | 0.991   | 1.04                           | 0.028      | 0.20    | 1.02                                               | 0.022      | 0.32    | 0.42             |
| <b>Previously-identified variants</b> |      |                 |               |               |              |                     |                                |            |         |                                |            |         |                                                    |            |         |                  |
| rs58542926                            | 19   | 19379549        | <i>TM6SF2</i> | T             | C            | 0.07                | 1.41                           | 0.050      | 6E-12   | 1.38                           | 0.044      | 8E-13   | 1.39                                               | 0.033      | 3E-23   | 0.71             |
| rs429358                              | 19   | 45411941        | <i>APOE</i>   | T             | C            | 0.85                | 1.24                           | 0.045      | 1E-06   | 1.18                           | 0.036      | 5E-06   | 1.20                                               | 0.028      | 5E-11   | 0.37             |
| rs738409                              | 22   | 44324727        | <i>PNPLA3</i> | G             | C            | 0.21                | 1.52                           | 0.033      | 9E-37   | 1.38                           | 0.027      | 7E-32   | 1.44                                               | 0.050      | 2E-13   | 0.02             |

Effects on NAFLD/NASH in a subset of the UK Biobank who did not undergo abdominal MRI imaging (2,225 cases vs 360,685 controls) and NAFLD/NASH in Mass General Brigham Biobank (4,129 cases vs 26,444 controls) were measured. Effects of UK Biobank and Mass General Brigham Biobank were combined via fixed-effects inverse variance weighted meta-analysis; random-effects models were used when nominal heterogeneity was noted ( $P_{het} < 0.05$ ). NAFLD, nonalcoholic fatty liver disease; NASH, nonalcoholic steatohepatitis; Chr., chromosome; Freq., frequency; OR, odds ratio; SE, standard error;  $P_{het}$ , heterogeneity p-value.

**Table S10. Comparison of C statistics for discrimination of liver diseases with addition of an eight-variant polygenic score, Related to Figure 4.**

| Disease                          | N Events /<br>N Individuals | Model                      | C-statistic (95%CI) | P-value  |
|----------------------------------|-----------------------------|----------------------------|---------------------|----------|
| Nonalcoholic fatty liver disease | 1635 /<br>361852            | Baseline                   | 0.552 (0.538-0.566) | 4.41E-34 |
|                                  |                             | Baseline + Polygenic score | 0.598 (0.584-0.612) |          |
| Nonalcoholic steatohepatitis     | 208 /<br>361852             | Baseline                   | 0.603 (0.564-0.642) | 3.44E-16 |
|                                  |                             | Baseline + Polygenic score | 0.684 (0.648-0.721) |          |
| Cirrhosis                        | 977 /<br>361852             | Baseline                   | 0.674 (0.657-0.691) | 1.75E-30 |
|                                  |                             | Baseline + Polygenic score | 0.694 (0.677-0.711) |          |
| Hepatocellular Carcinoma         | 171 /<br>361852             | Baseline                   | 0.750 (0.713-0.786) | 2.55E-15 |
|                                  |                             | Baseline + Polygenic score | 0.770 (0.731-0.808) |          |

Baseline model: age + age squared + sex + genotyping array + 10 principal components of ancestry.  
P-value, comparison of baseline and baseline + polygenic score models using likelihood ratio test.

**Table S11. Rare inactivating variants in *APOB* are associated with decreased circulating lipids but increased markers of liver injury, Related to Figure 5.**

|                                            | <i>APOB</i>               |                                             |                     | <i>MTTP</i>               |                                            |                     |
|--------------------------------------------|---------------------------|---------------------------------------------|---------------------|---------------------------|--------------------------------------------|---------------------|
|                                            | Noncarriers<br>(N=168470) | inactivating<br>variant carriers<br>(N=130) | Adjusted<br>P-value | Noncarriers<br>(N=168510) | inactivating<br>variant carriers<br>(N=90) | Adjusted<br>P-value |
| BMI, mean (SD)                             | 27.4 (4.72)               | 27.4 (4.21)                                 | 0.91                | 27.4 (4.72)               | 27.3 (4.50)                                | 0.83                |
| Obesity, N (%)                             | 40081 (23.8%)             | 35 (26.9%)                                  | 0.36                | 40098 (23.8%)             | 18 (20.0%)                                 | 0.42                |
| Apolipoprotein B, mean (SD), g/L           | 1.03 (0.24)               | 0.643 (0.29)                                | 5.48E-48            | 1.03 (0.24)               | 1.03 (0.25)                                | 0.61                |
| LDL cholesterol, mean (SD), mg/dL          | 146 (33.0)                | 81.2 (38.1)                                 | 3.74E-113           | 146 (33.0)                | 149 (34.3)                                 | 0.60                |
| Triglycerides, mean (SD), mg/dL            | 160 (95.3)                | 87.2 (68.4)                                 | 7.77E-18            | 160 (95.3)                | 151 (59.2)                                 | 0.37                |
| Alanine aminotransferase, mean (SD), U/L   | 23.4 (13.8)               | 31.6 (24.0)                                 | 9.62E-13            | 23.4 (13.8)               | 24.7 (13.9)                                | 0.26                |
| Aspartate aminotransferase, mean (SD), U/L | 26.2 (10.2)               | 29.9 (14.6)                                 | 1.73E-05            | 26.2 (10.2)               | 26.9 (9.33)                                | 0.45                |
| Coronary artery disease, N (%)             | 10071 (6.0%)              | 2 (1.5%)                                    | 0.04                | 10067 (6.0%)              | 6 (6.7%)                                   | 0.93                |
| Type 2 diabetes, N (%)                     | 13340 (7.9%)              | 14 (10.8%)                                  | 0.24                | 13341 (7.9%)              | 13 (14.4%)                                 | 0.04                |

Apolipoprotein B values were missing in 55/130 *APOB* inactivating variant carriers (42%) and 8796/168470 controls (5%), all other measurements had <3% difference in missingness between groups. Obesity was defined as body-mass index (BMI)  $\geq 30$  kg/m<sup>2</sup> [1]. LDL cholesterol and triglycerides were adjusted for lipid-lowering medication to estimate untreated values as previously described [5].

**Table S12. Characteristics of UK Biobank participants with hepatic steatosis stratified by presence of an inactivating variant in *APOB* or *MTTP*, Related to Figure 5.**

|                                            | <i>APOB</i> inactivating variant carriers (N=13) |                  |                  | <i>MTTP</i> inactivating variant carriers (N=14) |                  |                  | Combined <i>APOB</i> and <i>MTTP</i> inactivating variant carriers (N=27) |                  |                  |
|--------------------------------------------|--------------------------------------------------|------------------|------------------|--------------------------------------------------|------------------|------------------|---------------------------------------------------------------------------|------------------|------------------|
|                                            | Noncarriers (N=3260)                             | Adjusted P-value | Adjusted P-value | Noncarriers (N=3259)                             | Adjusted P-value | Adjusted P-value | Noncarriers (N=3246)                                                      | Adjusted P-value | Adjusted P-value |
| BMI, mean (SD)                             | 29.6 (4.3)                                       | 27.6 (3.5)       | 0.10             | 29.6 (4.3)                                       | 28.0 (3.3)       | 0.21             | 29.6 (4.3)                                                                | 27.8 (3.3)       | 0.04             |
| Obesity, N (%)                             | 1294 (39.7%)                                     | 3 (23.1%)        | 0.23             | 1294 (39.7%)                                     | 3 (21.4%)        | 0.21             | 1291 (39.8%)                                                              | 6 (22.2%)        | 0.08             |
| Apolipoprotein B, mean (SD), g/L           | 1.08 (0.24)                                      | 0.60 (0.24)      | 9.9E-07          | 1.08 (0.24)                                      | 1.15 (0.31)      | 0.24             | 1.08 (0.24)                                                               | 0.99 (0.39)      | 0.09             |
| LDL cholesterol, mean (SD), mg/dL          | 151 (31.8)                                       | 73.2 (34.4)      | 1.4E-18          | 150 (32.1)                                       | 168 (48.4)       | 0.05             | 150 (31.7)                                                                | 122 (63.6)       | 3.2E-06          |
| Triglycerides, mean (SD), mg/dL            | 204 (110)                                        | 60.6 (29.6)      | 2.5E-06          | 203 (110)                                        | 174 (57.3)       | 0.29             | 204 (110)                                                                 | 120 (73.5)       | 5.4E-05          |
| Alanine aminotransferase, mean (SD), U/L   | 31.1 (18.1)                                      | 31.0 (14.8)      | 0.91             | 31.1 (18.1)                                      | 25.7 (10.6)      | 0.25             | 31.1 (18.1)                                                               | 28.2 (12.8)      | 0.46             |
| Aspartate aminotransferase, mean (SD), U/L | 28.6 (10.8)                                      | 26.9 (5.08)      | 0.60             | 28.6 (10.8)                                      | 28.1 (6.41)      | 0.80             | 28.6 (10.9)                                                               | 27.5 (5.73)      | 0.58             |
| Coronary artery disease, N (%)             | 165 (5.1%)                                       | 0 (0%)           | 0.97             | 165 (5.1%)                                       | 0 (0%)           | 0.97             | 165 (5.1%)                                                                | 0 (0%)           | 0.98             |
| Type 2 diabetes, N (%)                     | 484 (14.8%)                                      | 3 (23.1%)        | 0.40             | 485 (14.9%)                                      | 2 (14.3%)        | 0.82             | 482 (14.8%)                                                               | 5 (18.5%)        | 0.69             |
| Weekly drinks, U.S. standard               | 5.90 (7.54)                                      | 5.85 (6.23)      | 0.97             | 5.90 (7.54)                                      | 4.96 (5.59)      | 0.57             | 5.90 (7.55)                                                               | 5.39 (5.81)      | 0.71             |
| Excessive alcohol intake, U.S., N (%)      | 232 (7.1%)                                       | 0 (0%)           | 0.97             | 232 (7.1%)                                       | 0 (0%)           | 0.97             | 232 (7.1%)                                                                | 0 (0%)           | 0.96             |
| Excessive alcohol intake, U.K., N (%)      | 855 (26.2%)                                      | 4 (30.8%)        | 0.69             | 855 (26.2%)                                      | 4 (28.6%)        | 0.89             | 851 (26.2%)                                                               | 8 (29.6%)        | 0.71             |

Apolipoprotein B values were missing in 7/13 *APOB* inactivating variant carriers (53%) and 199/3260 controls (6%), all other measurements had <3% difference in missingness between groups. Obesity was defined as body-mass index (BMI)  $\geq 30$  kg/m<sup>2</sup> [1]; excessive alcohol intake, U.S. was defined as alcohol intake exceeding American Association for the Study of Liver Disease guidelines for NAFLD definition [2]; excessive alcohol intake, U.K. was defined as alcohol intake exceeding the UK Chief Medical Officers recommendations [3]. LDL cholesterol and triglycerides were adjusted for lipid-lowering medication to estimate untreated values as previously described [5].

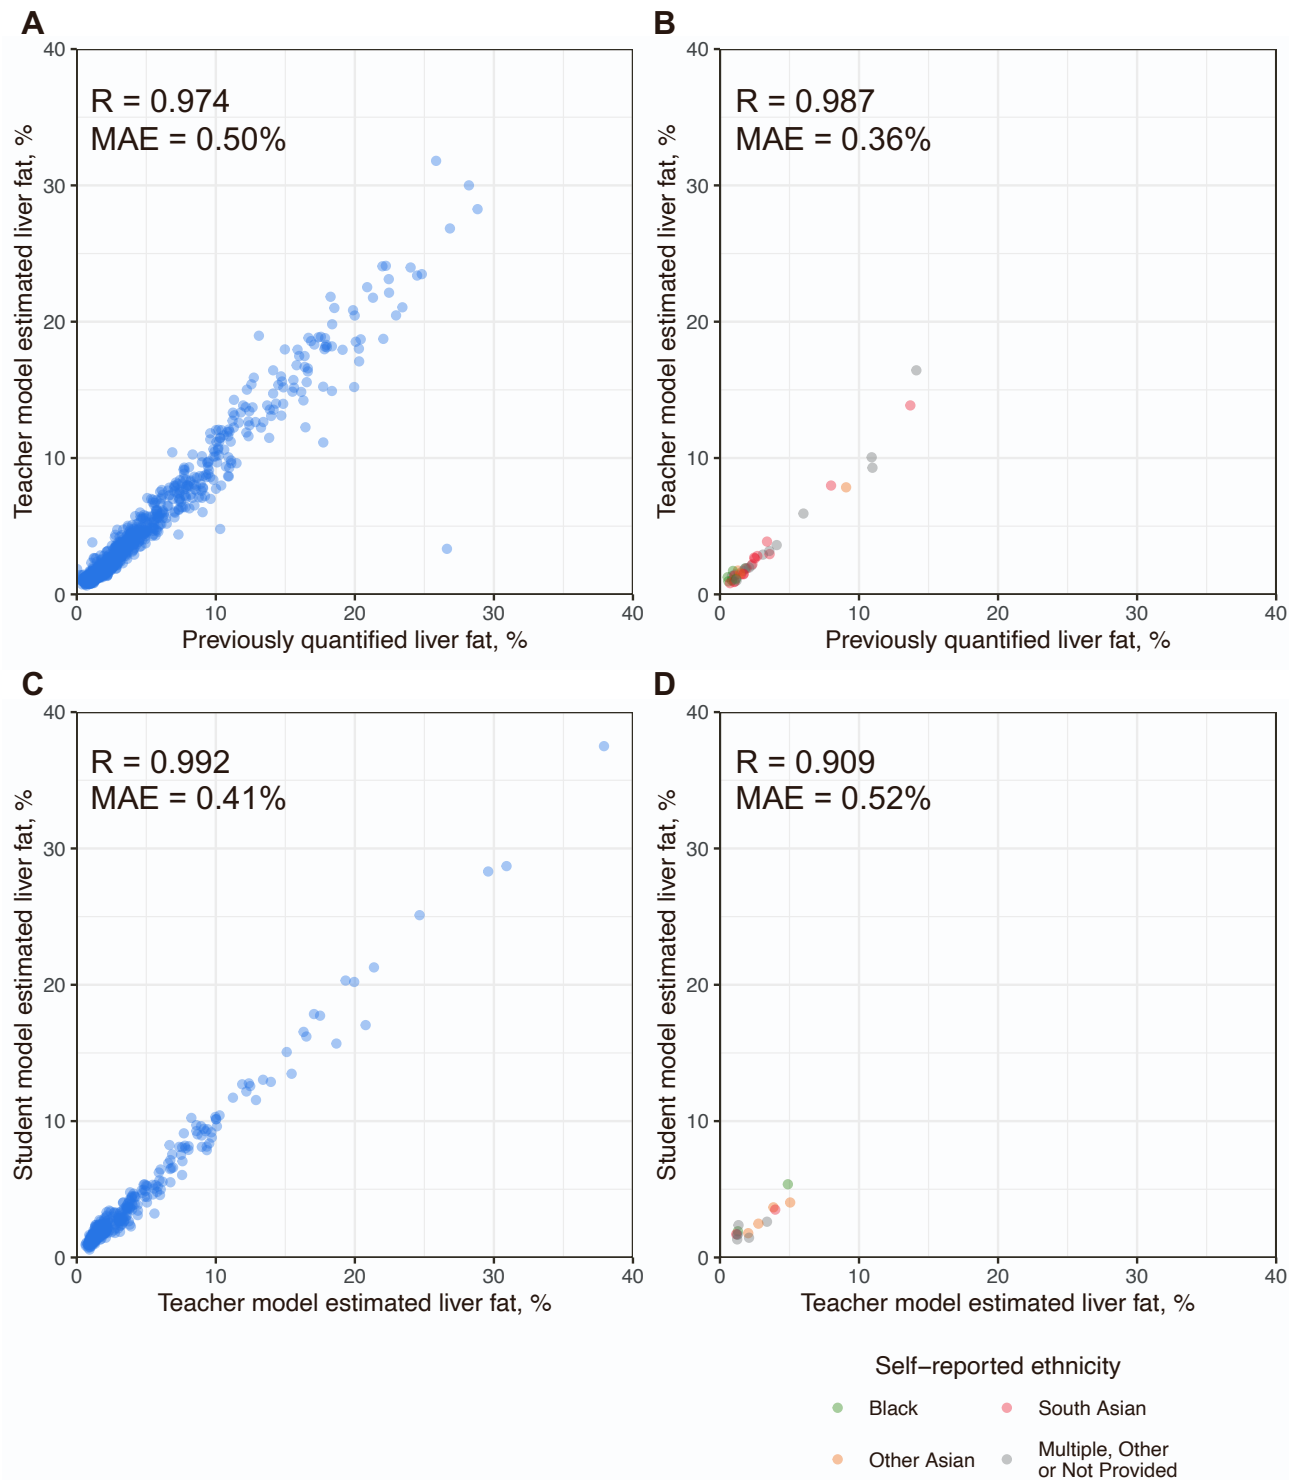

**Figure S1. Comparison of previously-quantified liver fat with teacher-model inferences, and teacher-model inferences with student-model inferences, Related to STAR methods.** **A)** In a held-out set of 1,214 participants with previously-quantified liver fat from gradient-echo imaging who were not used for model creation, the Pearson correlation between previously-quantified liver fat and liver fat inferred from the machine learning teacher model was 0.974 (95% CI 0.971-0.977;  $P < 2.4 \times 10^{-784}$ ), and the mean absolute error was 0.50% (95% CI, 0.45-0.55%). **B)** The subset of testing individuals in A) with self-reported non-European ethnicity. **C)** In a separate held-out set of 383 samples with both gradient-echo and IDEAL imaging who were not used for model creation, the Pearson correlation between the teacher model inferred liver fat and the student model inferred liver fat was 0.992 (95% CI 0.990-0.993;  $P = 3.1 \times 10^{-351}$ ) and the mean absolute error was 0.41% (95% CI, 0.37-0.46%). **D)** The subset of testing individuals in C) with self-reported non-European ethnicity.

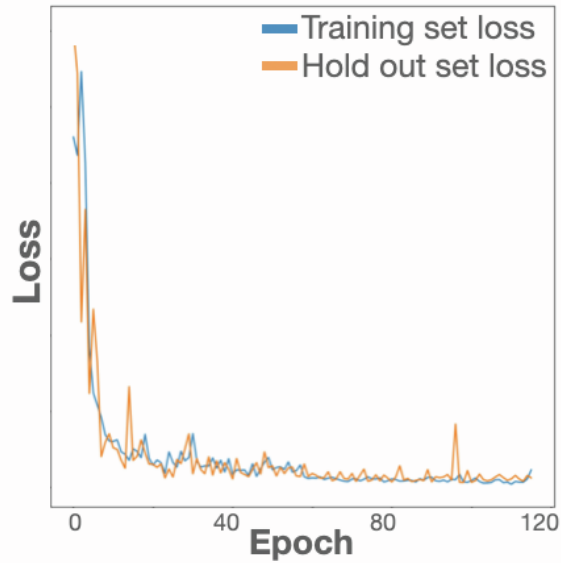

**Figure S2. Assessment of machine learning model overfitting via model loss, Related to STAR methods.** To determine whether our machine learning model quantifying liver fat was prone to overfitting, we generated learning curves that show model's loss parameters according to epoch on the training set of images from 2,915 individuals (blue line) and on a held-out set of data set of images from 635 individuals (orange line) distinct from the final test set. Each epoch was defined as a full pass over the training set MRIs. Increased loss in the training set is suggestive of model overfitting. By the end of training, we note consistent loss in the training and validation dataset suggestive no evidence of overfitting.



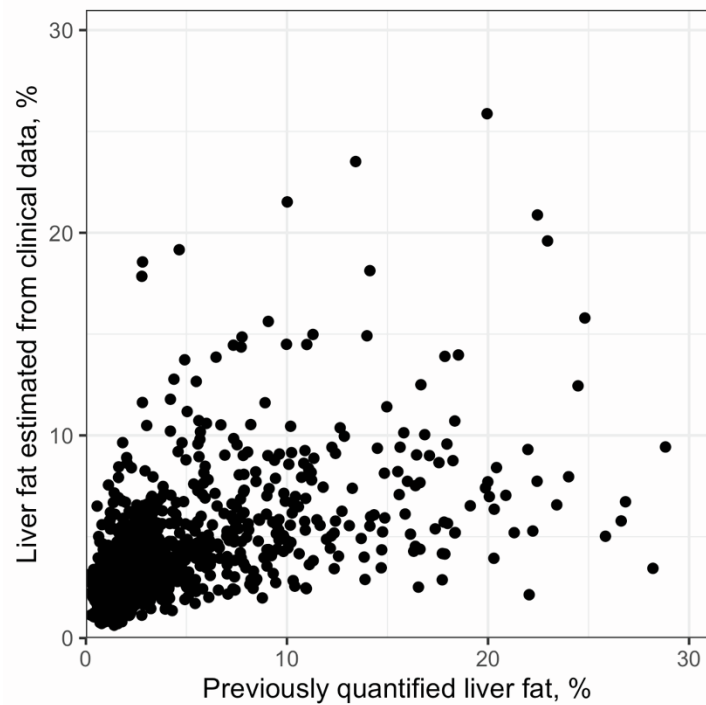

**Figure S3. Prediction of liver fat using a variable dispersion beta regression model of clinical and anthropometric measurements, Related to STAR methods.** In a held-out set of 1,214 participants with previously-estimated liver fat, the Pearson correlation between the previously-quantified liver fat and liver fat estimated from a beta regression model using clinical and anthropometric measurements was 0.578 (95% CI 0.539-0.614;  $p$ -value= $3.8 \times 10^{-109}$ ). Measurements that were at least nominally ( $p$ -value < 0.05) associated with liver fat in univariable analysis and therefore included in the beta regression model were: body-mass index, waist circumference, hip circumference, total body fat mass, total body fat percent, age at baseline, sex, height, weight, trunk fat mass, trunk fat percent, waist-to-hip ratio, LDL cholesterol, total cholesterol, HDL cholesterol, triglycerides, systolic blood pressure, alkaline phosphatase, alanine aminotransferase (ALT), aspartate aminotransferase (AST), ALT/AST, gamma glutamyltransferase, hemoglobin A1c, random glucose, and C-reactive protein. Lipid measures were adjusted for lipid-lowering medication use and blood pressure was adjusted for anti-hypertensive medication use, as previously described [4,5].

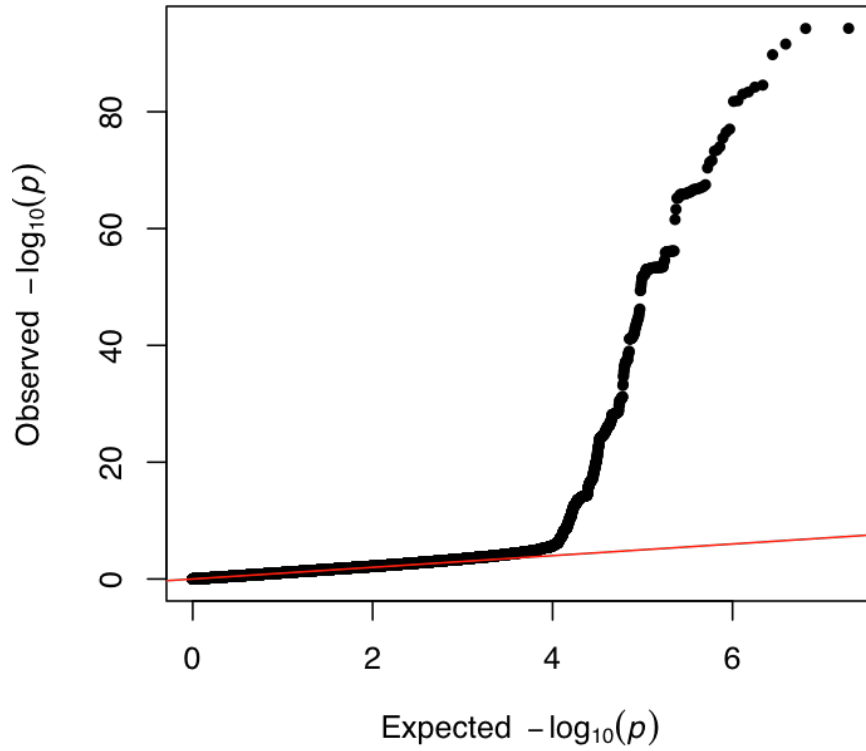

**Figure S4. Quantile-quantile plot for common variant genome-wide association study analysis of liver fat in 32,974 UK Biobank participants, Related to Figure 3.** Expected p-values from a uniform distribution for each variant in the genome-wide association study (GWAS) are shown on the x-axis; the corresponding observed p-values for each variant are shown on the y-axis.

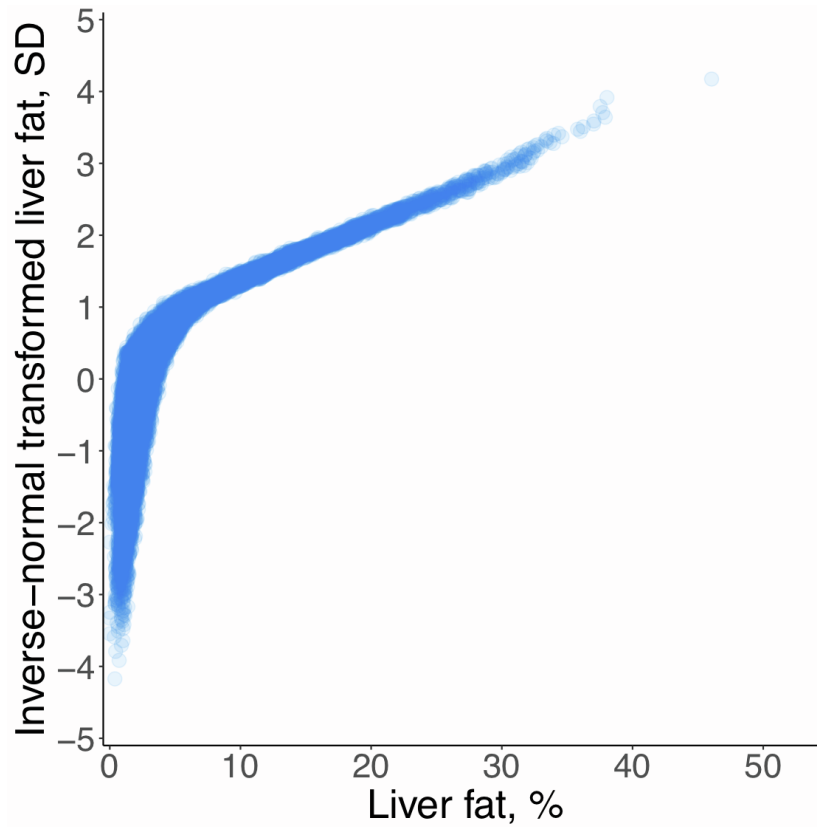

**Figure S5. Relationship between percent liver fat and inverse normal transformation of percent liver fat among 32,974 UK Biobank participants, Related to Figures 3-5.** Percent liver fat is shown on the x-axis; the inverse-normal transformation of percent liver fat used in common genome-wide and rare variant association studies (GWAS and RVAS) is shown on the y-axis.

## Supplemental References

1. NHLBI Expert Panel (1998). Clinical Guidelines on the Identification, Evaluation, and Treatment of Overweight and Obesity in Adults--The Evidence Report. *Obes. Res.* 6 *Suppl* 2, 51S-209S.
2. Chalasani, N., Younossi, Z., Lavine, J.E., Charlton, M., Cusi, K., Rinella, M., Harrison, S.A., Brunt, E.M., and Sanyal, A.J. (2018). The diagnosis and management of nonalcoholic fatty liver disease: Practice guidance from the American Association for the Study of Liver Diseases. *Hepatology*. *Baltim. Md* 67, 328–357.
3. Department of Health (2016). UK Chief Medical Officers' Low Risk Drinking Guidelines.
4. Ehret, G.B., Ferreira, T., Chasman, D.I., Jackson, A.U., Schmidt, E.M., Johnson, T., Thorleifsson, G., Luan, J., Donnelly, L.A., Kanoni, S., *et al.* (2016). The genetics of blood pressure regulation and its target organs from association studies in 342,415 individuals. *Nat. Genet.* 48, 1171–1184.
5. Patel, A.P., Wang, M., Fahed, A.C., Mason-Suares, H., Brockman, D., Pelletier, R., Amr, S., Machini, K., Hawley, M., Witkowski, L., *et al.* (2020). Association of Rare Pathogenic DNA Variants for Familial Hypercholesterolemia, Hereditary Breast and Ovarian Cancer Syndrome, and Lynch Syndrome With Disease Risk in Adults According to Family History. *JAMA Netw. Open* 3, e203959.
6. Anstee, Q.M., Darlay, R., Cockell, S., Meroni, M., Govaere, O., Tiniakos, D., Burt, A.D., Bedossa, P., Palmer, J., Liu, Y.-L., *et al.* (2020). Genome-wide association study of non-alcoholic fatty liver and steatohepatitis in a histologically characterised cohort. *J. Hepatology*. 73, 505–515.
7. Speliotes, E.K., Yerges-Armstrong, L.M., Wu, J., Hernaez, R., Kim, L.J., Palmer, C.D., Gudnason, V., Eiriksdottir, G., Garcia, M.E., Launer, L.J., *et al.* (2011). Genome-Wide Association Analysis Identifies Variants Associated with Nonalcoholic Fatty Liver Disease That Have Distinct Effects on Metabolic Traits. *PLoS Genet.* 7, e1001324-14.
8. Palmer, N.D., Musani, S.K., Yerges-Armstrong, L.M., Feitosa, M.F., Bielak, L.F., Hernaez, R., Kahali, B., Carr, J.J., Harris, T.B., Jhun, M.A., *et al.* (2013). Characterization of European ancestry nonalcoholic fatty liver disease-associated variants in individuals of African and Hispanic descent. *Hepatology*. *Baltim. Md* 58, 966–975.
9. Parisinos, C.A., Wilman, H.R., Thomas, E.L., Kelly, M., Nicholls, R.C., McGonigle, J., Neubauer, S., Hingorani, A.D., Patel, R.S., Hemingway, H., *et al.* (2020). Genome-wide and Mendelian randomisation studies of liver MRI yield insights into the pathogenesis of steatohepatitis. *J. Hepatology*, 1–41.
10. Palmer, N.D., Kahali, B., Kuppa, A., Chen, Y., Du, X., Feitosa, M.F., Bielak, L.F., O'Connell, J.R., Musani, S.K., Guo, X., *et al.* (2021). Allele-specific variation at APOE increases nonalcoholic fatty liver disease and obesity but decreases risk of Alzheimer's disease and myocardial infarction. *Hum. Mol. Genet.* 30, 1443–1456.

11. Abul-Husn, N.S., Cheng, X., Li, A.H., Xin, Y., Schurmann, C., Stevis, P., Liu, Y., Kozlitina, J., Stender, S., Wood, G.C., *et al.* (2018). A Protein-Truncating HSD17B13 Variant and Protection from Chronic Liver Disease. *N. Engl. J. Med.* 378, 1096–1106.
12. Ma, Y., Belyaeva, O.V., Brown, P.M., Fujita, K., Valles, K., Karki, S., de Boer, Y.S., Koh, C., Chen, Y., Du, X., *et al.* (2019). 17-Beta Hydroxysteroid Dehydrogenase 13 Is a Hepatic Retinol Dehydrogenase Associated With Histological Features of Nonalcoholic Fatty Liver Disease. *Hepatology*. Baltim. Md 69, 1504–1519.
13. Gellert-Kristensen, H., Nordestgaard, B.G., Tybjærg-Hansen, A., and Stender, S. (2020). High Risk of Fatty Liver Disease Amplifies the Alanine Transaminase–Lowering Effect of a HSD17B13 Variant. *Hepatology* 71, 56–66.
14. Schwantes-An, T.-H., Darlay, R., Mathurin, P., Masson, S., Liangpunsakul, S., Mueller, S., Aithal, G.P., Eyer, F., Gleeson, D., Thompson, A., *et al.* (2020). Genome-wide association study and meta-analysis on alcohol-related liver cirrhosis identifies novel genetic risk factors. *Hepatology*. Baltim. Md.
15. Feitosa, M.F., Wojczynski, M.K., North, K.E., Zhang, Q., Province, M.A., Carr, J.J., and Borecki, I.B. (2013). The ERLIN1-CHUK-CWF19L1 gene cluster influences liver fat deposition and hepatic inflammation in the NHLBI Family Heart Study. *Atherosclerosis* 228, 175–180.
16. Buch, S., Stickel, F., Trépo, E., Way, M., Herrmann, A., Nischalke, H.D., Brosch, M., Rosendahl, J., Berg, T., Ridinger, M., *et al.* (2015). A genome-wide association study confirms PNPLA3 and identifies TM6SF2 and MBOAT7 as risk loci for alcohol-related cirrhosis. *Nat. Genet.* 47, 1443–1448.
17. Mancina, R.M., Dongiovanni, P., Petta, S., Pingitore, P., Meroni, M., Rametta, R., Borén, J., Montalcini, T., Pujia, A., Wiklund, O., *et al.* (2016). The MBOAT7-TMC4 Variant rs641738 Increases Risk of Nonalcoholic Fatty Liver Disease in Individuals of European Descent. *Gastroenterology* 150, 1219-1230.e6.
18. Teo, K., Abeysekera, K.W.M., Adams, L., Aigner, E., Anstee, Q.M., Banales, J.M., Banerjee, R., Basu, P., Berg, T., Bhatnagar, P., *et al.* (2021). rs641738C>T near MBOAT7 is associated with liver fat, ALT and fibrosis in NAFLD: A meta-analysis. *J. Hepatol.* 74, 20–30.
